# Supplementary material for: Bio-inspired adhesive superhydrophobic polyimide mat with high thermal stability
Source: Royal Society of Chemistry journal article supplement (doi:10.1039/c2jm16503a), 2012-01-01
Supplement: c2jm16503a.pdf [file c2jm16503a.pdf]

## Supporting Materials

# **Bio-inspired Adhesive Superhydrophobic Polyimide Mat with High Thermal Stability**

Guangming Gong,<sup>a</sup> Juntao Wu,<sup>\*a</sup> Jingang Liu,<sup>b</sup> Na Sun,<sup>a</sup> Yong Zhao,<sup>\*a</sup> and Lei Jiang<sup>a,c</sup>

<sup>a</sup>*Key Laboratory of Bio-Inspired Smart Interfacial Science and Technology of Ministry of Education, School of Chemistry and Environment, Beihang University, Beijing 100191, P.R. China,*

<sup>b</sup>*Laboratory of Advanced Material, Institute of Chemistry, Chinese Academy of Sciences, Zhongguancun North First Street 2, Beijing, 100190, P. R. China,*

<sup>c</sup>*Beijing National Laboratory for Molecular Sciences (BNLMS), Key Laboratory of Organic Solids, Institute of Chemistry, Chinese Academy of Sciences, Zhongguancun North First Street 2, Beijing, 100190, P.R. China.*

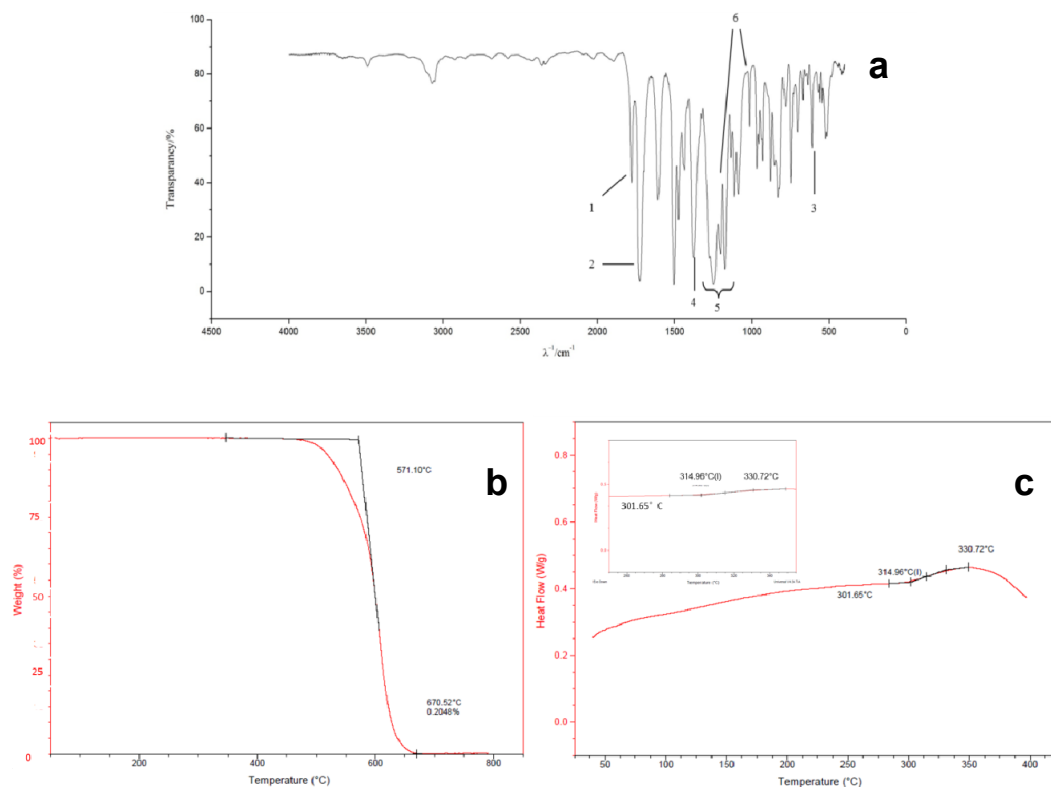

**Fig. S1** (a) IR spectra of the as-prepared FPI film; 1)-3) adsorption peaks of C=O's asym. stretching, sym. stretching, bending in the five-membered aromatic imide cycles, respectively; 4) adsorption peak of C-N's stretching in the imide ring; 5) C-F's adsorption band; 6) Adsorption peaks of -O-'s asym. stretching (strong) and sym. Stretching (weak), respectively. (b) TGA of ODPA-6FBAPP, conducted in  $\text{N}_2$  atmosphere; the 5% mass loss temperature is 517.9  $^{\circ}\text{C}$ . (c) DSC of ODPA-6FBAPP, conducted in  $\text{N}_2$  atmosphere. The thermal analysis results demonstrated the high thermal stability of FPI.

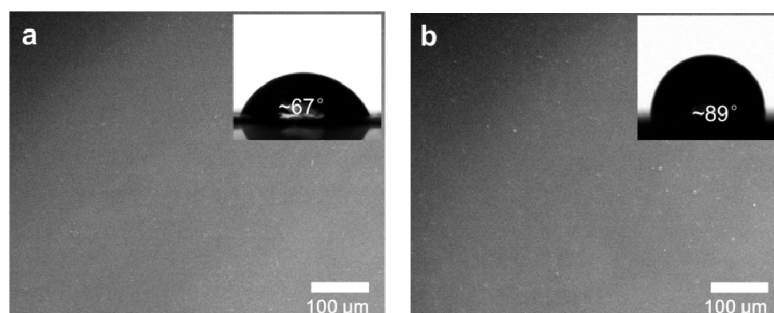

**Fig.S2** SEM of (a) a casted PMDA-ODA film and (b) a casted ODPA-6FBAPP film. The insert pictures are water CAs on each sample. The water CA on the casted FPI film increased to 89 $^{\circ}$ , demonstrating the surface free energy of FPI was undermined.

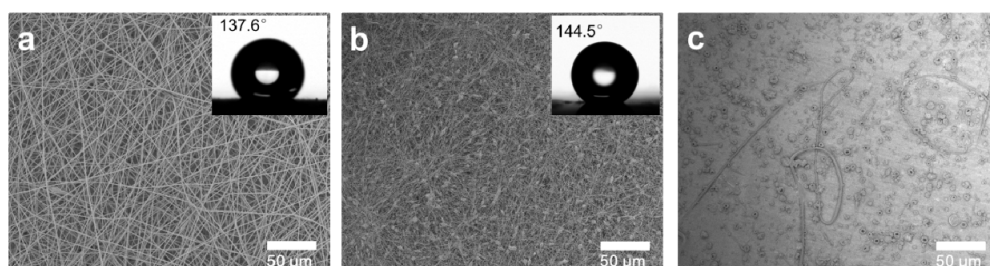

**Fig.S3** Fiber morphology varies when concentration changes. (a) When concentration of FPI in DMAC is 10 wt%, there would be no beads on the fibers and the CA is low; (b) Bead-on-string morphology of the mat could be obtained by electrospinning 5 wt% FPI/DMAC solution without fracture of fibers; (c) if less than 5 wt%, fiber structures were unable to form, only with particles. Such structure was obtained from the 3 wt% FPI/DMAC. Note that (c) is a demonstration that FPI solutions with low concentration are not spin-able. So there was no CA given.

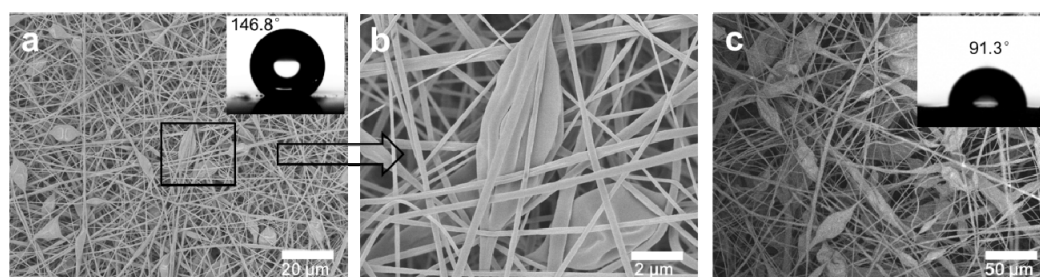

**Figure S4.** Excessive amount of THF is negative for the generation of ideal nano-micro composite structures. (a) As the amount of THF increased (DMAC: THF=1: 3), those nano mastoids vanished and some gully-like structure showed up and the water CA decreased. (b) Specific enlargement of (a). (c) Electrospun mat from FPI/THF solution. The morphology of this sample is bizarre and the mat is not superhydrophobic.

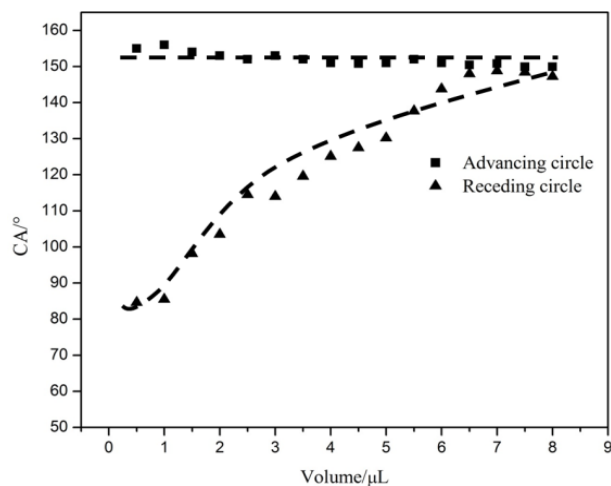

**Figure S5.** CA hysteresis curve of the superhydrophobic electrospun FPI mat and the water CA hysteresis is as high as  $72^\circ$

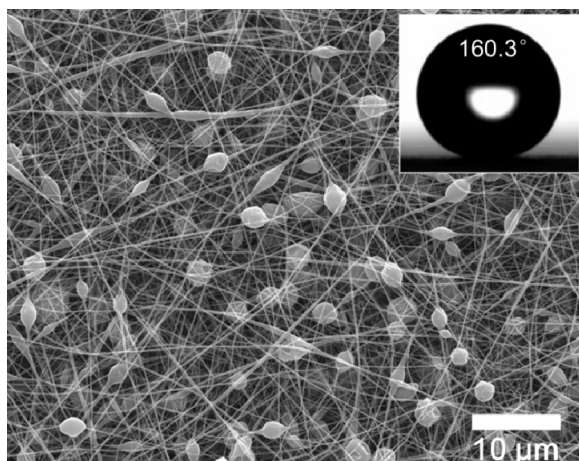

**Figure S6.** Surface structures and water CA of superhydrophobic electrospun PS mat.
